# Supplementary material for: Design and Fabrication of 3D printed Scaffolds with a Mechanical Strength Comparable to Cortical Bone to Repair Large Bone Defects
Source: PubMed Central journal article supplement (PMC4726111; doi:10.1038/srep19468), 2016-01-19
Supplement: srep19468-s1.pdf [file srep19468-s1.pdf]

**Design and Fabrication of 3D printed Scaffolds with a Mechanical Strength Comparable to Cortical Bone  
to Repair Large Bone Defects**

*Seyed-Iman Roohani-Esfahani<sup>1</sup>, Peter Newman<sup>1</sup> and Hala Zreiqat<sup>1\*</sup>*

<sup>1</sup>Biomaterials and Tissue Engineering Research Unit, School of Aeronautical Mechanical and Mechatronics Engineering, University of Sydney, 2006, NSW, Australia

**Supporting Information**

**Table S1.** Numerical results of all tested structures.

| Design type                                                                         | Design No. | Max. pore size(X-Y, $\mu\text{m}$ ) | Min. pore size(X-Y, $\mu\text{m}$ ) | Pore size (Z, $\mu\text{m}$ ) | Porosity,% (Archimedes) | Porosity,% ( $\mu\text{-CT}$ ) | Compressive strength(MPa) | Bending strength(MPa) |
|-------------------------------------------------------------------------------------|------------|-------------------------------------|-------------------------------------|-------------------------------|-------------------------|--------------------------------|---------------------------|-----------------------|
| 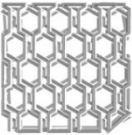  | 1          | 1850                                | 350                                 | 250                           | 66.5                    | 65.2                           | 90 $\pm$ 6                | 21 $\pm$ 3            |
|                                                                                     | 2          | 1258                                | 350                                 | 250                           | 58.1                    | 56.7                           | 122 $\pm$ 12              | 27 $\pm$ 2            |
|                                                                                     | 3          | 1050                                | 350                                 | 250                           | 52.8                    | 51.0                           | 146 $\pm$ 14              | 38 $\pm$ 5            |
|                                                                                     | 4          | 638                                 | 350                                 | 250                           | 45.2                    | 47.8                           | 180 $\pm$ 11              | 50 $\pm$ 4            |
|  | 1          | 1438                                | -                                   | 250                           | 68.5                    | 66.2                           | 55 $\pm$ 9                | 15 $\pm$ 1            |
|                                                                                     | 2          | 980                                 | -                                   | 250                           | 61.0                    | 57.8                           | 96 $\pm$ 9                | 21 $\pm$ 3            |
|                                                                                     | 3          | 578                                 | -                                   | 250                           | 55.4                    | 51.2                           | 130 $\pm$ 15              | 28 $\pm$ 2            |
|                                                                                     | 4          | 467                                 | -                                   | 250                           | 50.5                    | 46.8                           | 145 $\pm$ 12              | 31 $\pm$ 7            |
|  | 1          | 1272                                | -                                   | 250                           | 70.0                    | 66.1                           | 53 $\pm$ 9                | 14 $\pm$ 2            |
|                                                                                     | 2          | 951                                 | -                                   | 250                           | 60.4                    | 61.7                           | 73 $\pm$ 9                | 22 $\pm$ 2            |
|                                                                                     | 3          | 652                                 | -                                   | 250                           | 55.1                    | 52.1                           | 121 $\pm$ 12              | 28 $\pm$ 3            |
|                                                                                     | 4          | 516                                 | -                                   | 250                           | 50.1                    | 48.5                           | 140 $\pm$ 15              | 33 $\pm$ 5            |
|  | 1          | 1887                                | 566                                 | 250                           | 68.3                    | 68.1                           | 68 $\pm$ 10               | 19 $\pm$ 2            |
|                                                                                     | 2          | 1413                                | 343                                 | 250                           | 63.7                    | 62.3                           | 86 $\pm$ 8                | 27 $\pm$ 9            |
|                                                                                     | 3          | 946                                 | 157                                 | 250                           | 58.1                    | 55.2                           | 118 $\pm$ 10              | 32 $\pm$ 6            |
|                                                                                     | 4          | 644                                 | 120                                 | 250                           | 52.8                    | 49.3                           | 130 $\pm$ 17              | 40 $\pm$ 6            |

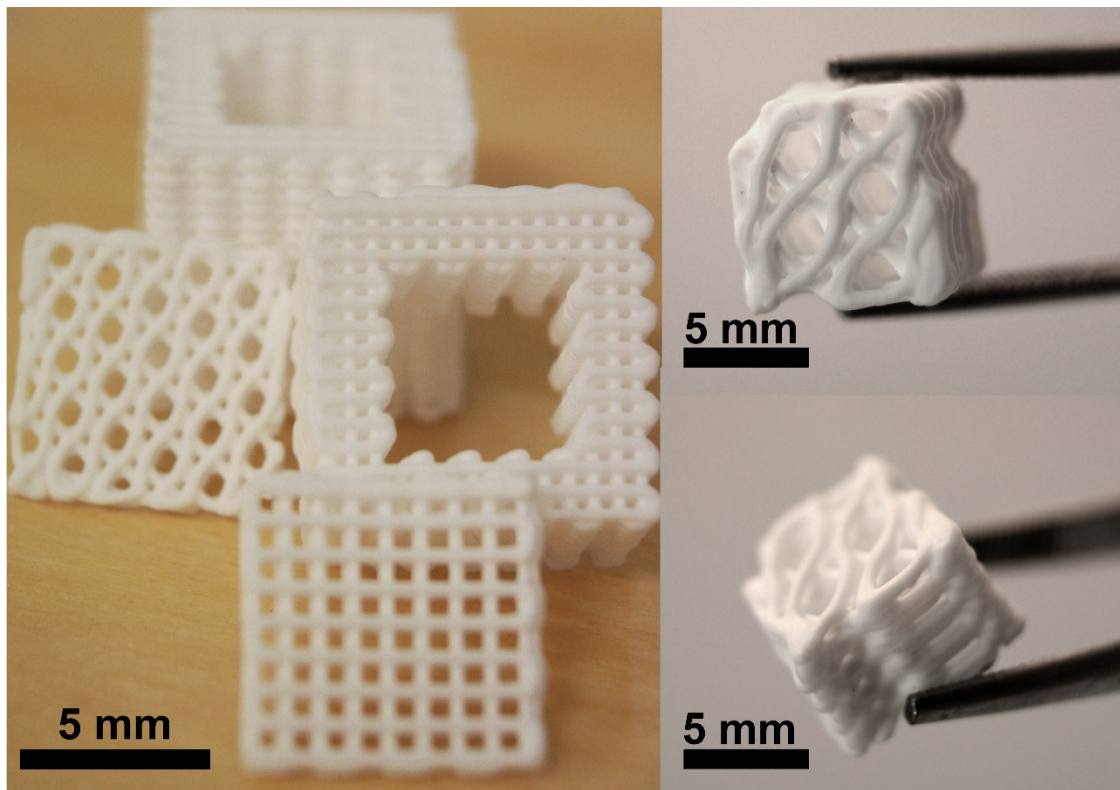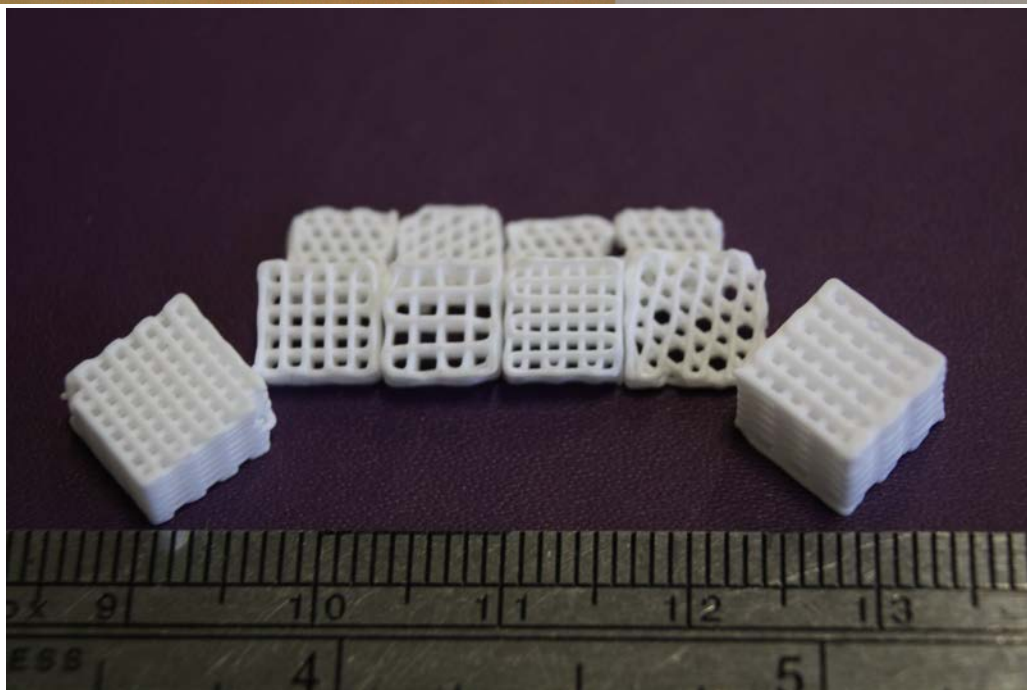

**Figure S1.** Digital images of printed scaffolds with different patterns and shapes.

**Movie S1.** Uniaxial compression test of (S1a) hexagonal, (S1b) curved, (S1c) zigzag and (S1d) rectangular patterned scaffold captured by a high-speed camera. “Arrows” show the location of crack initiation and “lines” illustrate the formation of secondary cracks and their

propagation path upon continuous increasing of force. There are more secondary cracks formed in scaffolds with hexagonal pattern before catastrophic failure compared with rectangular and curved designs. This shows that hexagonal pattern facilitates an efficient load transfer in a scaffold by providing a high area of contact at intersections between printed layers.
